# Supplementary material for: Energetic costs regulated by cell mechanics and confinement are predictive of migration path during decision-making
Source: PubMed Central journal article supplement (PMC6744572; doi:10.1038/s41467-019-12155-z), 2019-09-13
Supplement: 41467_2019_12155_MOESM1_ESM.pdf [file 41467_2019_12155_MOESM1_ESM.pdf]

## **Supplementary Information**

**Energetic costs regulated by cell mechanics and confinement are predictive of migration path during decision-making**

Zanotelli et al.

**Supplementary Table 1. Model parameters.**

| <b>Parameter</b>   | <b>Meaning</b>                              | <b>Value</b>            | <b>Origin</b>                           |
|--------------------|---------------------------------------------|-------------------------|-----------------------------------------|
| $D_c$              | Assumed normal cell diameter                | 18 $\mu\text{m}$        | 1                                       |
| $E_c$              | Cell stiffness                              | 200-1000 Pa             | Adjusted, based on values measured here |
| $\nu_c$            | Poisson's ratio of the cell                 | 0.45                    | Assumed                                 |
| $E_{\text{ECM}}$   | Extracellular matrix stiffness              | 400-550 Pa              | 2                                       |
| $\nu_{\text{ECM}}$ | Poisson's ratio of the extracellular matrix | 0.45                    | Assumed                                 |
| $\sigma$           | Minimal energy required for migration       | 0.19 pJ s <sup>-1</sup> | 3                                       |

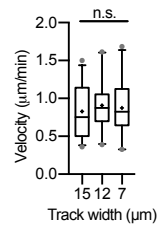

**Supplementary Figure 1. Cell migration speed and spatial confinement.** Quantification of cell velocity with increasing confinement ( $n = 34, 33, 22$  cells for 15, 12, 7  $\mu\text{m}$  tracks). Data shown as median  $\pm$  interquartile range (box), 5<sup>th</sup>–95<sup>th</sup> percentiles (whiskers), and mean (+); Kruskal-Wallis test with Dunn's post hoc analysis; n.s. = not significant.

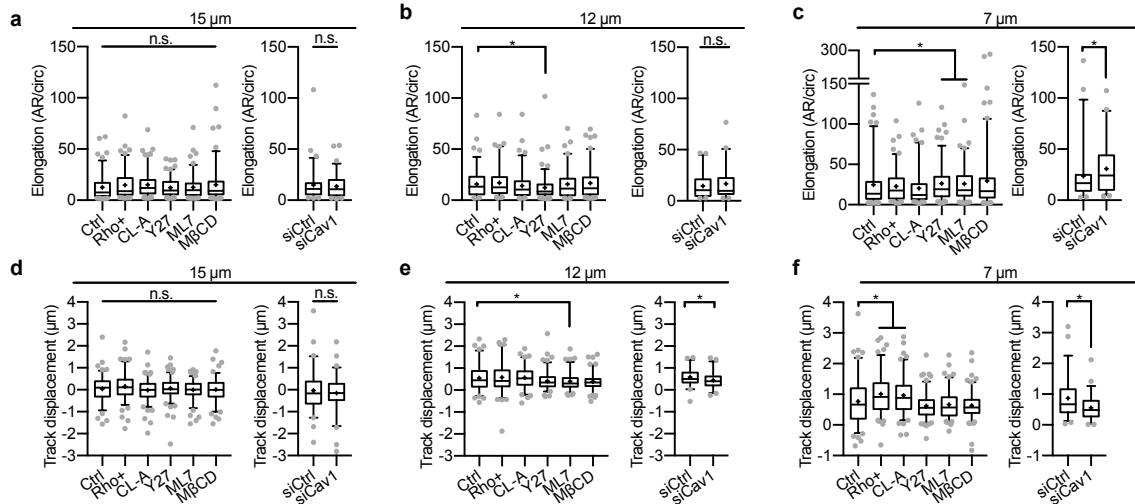

**Supplementary Figure 2. Cell stiffness-mediated changes in cell and matrix deformation increase with spatial confinement.** **a–c**, Quantification of cell elongation following pharmacological treatments and siCav1 knockdown in 15  $\mu\text{m}$  (**a**), 12  $\mu\text{m}$  (**b**), and 7  $\mu\text{m}$  (**c**) collagen microtracks. **d–f**, Quantification of track deformation post pharmacological treatments and siCav1 knockdown in 15  $\mu\text{m}$  (**d**), 12  $\mu\text{m}$  (**e**), and 7  $\mu\text{m}$  (**f**) collagen microtracks ( $n = \text{Ctrl}: 111, 91, 118$ ; Rho+: 111, 92, 107; CL-A: 121, 95, 100; Y27: 127, 117, 135; ML7: 114, 95, 107; M $\beta$ CD: 116, 105, 123; siCtrl: 63, 49, 53; siCav1: 68, 46, 55 cells for 15, 12, 7  $\mu\text{m}$  microtracks). Data shown as median  $\pm$  interquartile range (box), 5<sup>th</sup>–95<sup>th</sup> percentiles (whiskers), and mean (+); two-tailed Mann–Whitney test; \* $P < 0.05$ , n.s. = not significant.

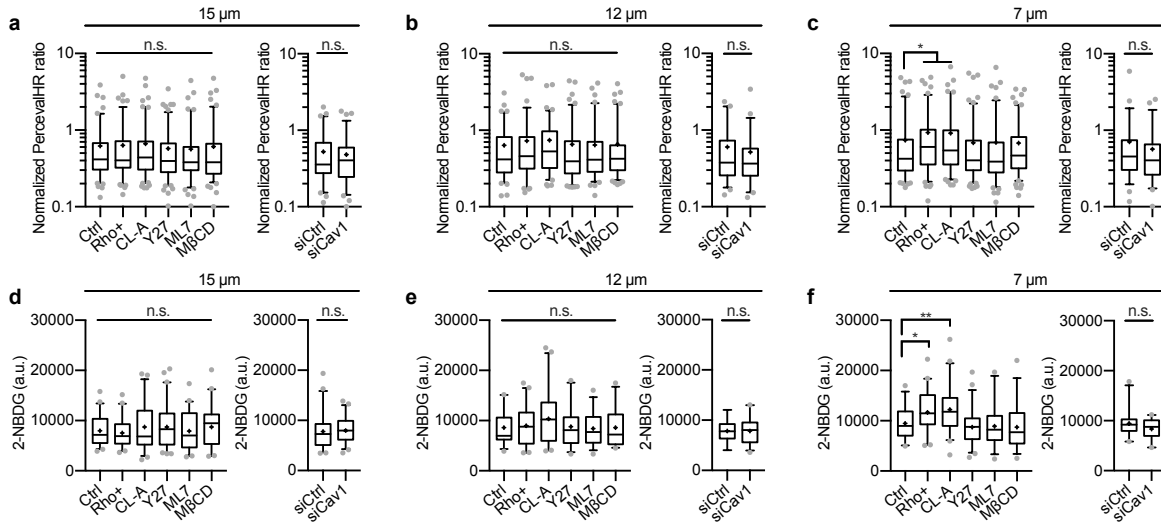

**Supplementary Figure 3. Cell stiffness-mediated changes in cellular ATP:ADP ratio and glucose uptake increase with spatial confinement.** **a–c**, Quantification of normalized PercevalHR ratio following pharmacological treatments and siCav1 knockdown in 15 μm (**a**), 12 μm (**b**), and 7 μm (**c**) collagen microtracks ( $n = \text{Ctrl}: 111, 91, 118; \text{Rho}^+: 111, 92, 107; \text{CL-A}: 121, 95, 100; \text{Y27}: 127, 117, 135; \text{ML7}: 114, 95, 107; \text{M}\beta\text{CD}: 116, 105, 123; \text{siCtrl}: 63, 49, 53; \text{siCav1}: 68, 46, 55$  cells for 15, 12, 7 μm microtracks). **d–f**, Quantification of 2-NBDG uptake following pharmacological treatments and siCav1 knockdown in 15 μm (**d**), 12 μm (**e**), and 7 μm (**f**) collagen microtracks ( $n = \text{Ctrl}: 46, 29, 36; \text{Rho}^+: 44, 41, 42; \text{CL-A}: 48, 40, 49; \text{Y27}: 61, 37, 46; \text{ML7}: 52, 38, 36; \text{M}\beta\text{CD}: 40, 24, 28; \text{siCtrl}: 46, 17, 22; \text{siCav1}: 46, 28, 21$  cells for 15, 12, 7 μm microtracks). Data shown as median  $\pm$  interquartile range (box), 5<sup>th</sup>–95<sup>th</sup> percentiles (whiskers), and mean (+); two-tailed Mann–Whitney test; \* $P < 0.05$ , \*\* $P < 0.01$ , n.s. = not significant.

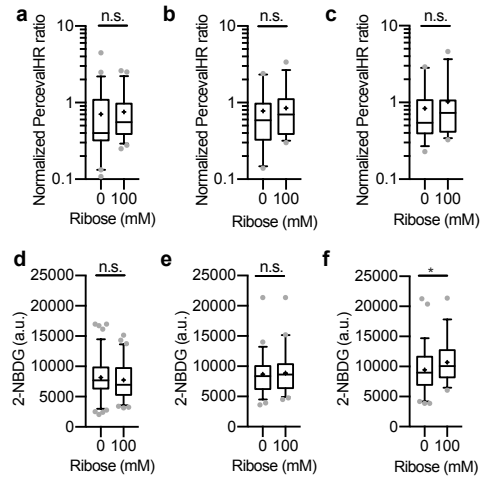

**Supplementary Figure 4. Matrix stiffness-mediated changes in cellular ATP:ADP ratio and glucose uptake with spatial confinement.** **a–c**, Quantification of normalized PercevalHR ratio for 15  $\mu\text{m}$  (**a**), 12  $\mu\text{m}$  (**b**), and 7  $\mu\text{m}$  (**c**) microtracks in collagen gels glycated with 0 mM or 100 mM ribose ( $n = 0 \text{ mM}: 47, 30, 31; 100 \text{ mM}: 49, 28, 29$  cells for 15, 12, 7  $\mu\text{m}$  tracks). **d–f**, Quantification of 2-NBDG uptake in 15  $\mu\text{m}$  (**d**), 12  $\mu\text{m}$  (**e**), and 7  $\mu\text{m}$  (**f**) microtracks in collagen gels glycated with 0 mM or 100 mM ribose ( $n = 0 \text{ mM}: 96, 53, 59; 100 \text{ mM}: 71, 46, 35$  cells for 15, 12, 7  $\mu\text{m}$  tracks). Data shown as median  $\pm$  interquartile range (box), 5<sup>th</sup>–95<sup>th</sup> percentiles (whiskers), and mean (+); two-tailed Mann–Whitney test;  $*P < 0.05$ , n.s. = not significant.

### Supplementary References

1. Kim, U. *et al.* Selection of mammalian cells based on their cell-cycle phase using dielectrophoresis. *Proc. Natl. Acad. Sci.* **104**, 20708–12 (2007).
2. Bordeleau, F. *et al.* Matrix stiffening promotes a tumor vasculature phenotype. *Proc. Natl. Acad. Sci.* **114**, 492–497 (2016).
3. Hecht, I. *et al.* The motility-proliferation-metabolism interplay during metastatic invasion. *Sci. Rep.* **5**, 13538 (2015).
