# Supplementary material for: Energetic costs regulated by cell mechanics and confinement are predictive of migration path during decision-making
Source: PubMed Central journal article supplement (PMC6744572; doi:10.1038/s41467-019-12155-z), 2019-09-13
Supplement: 41467_2019_12155_MOESM3_ESM.pdf [file 41467_2019_12155_MOESM3_ESM.pdf]

## Description of Additional Supplementary Files

**Title:** Supplementary Movie 1. Cell migration decision-making into the wider path.

**Description:** Phase contrast time-lapse imaging of MDA-MB-231 cell migration through the 15  $\mu\text{m}$  feeder track into the 12  $\mu\text{m}$  branch of a Y-shaped collagen microtrack. Time in h:min. Scale bar, 20  $\mu\text{m}$ .

**Title:** Supplementary Movie 2. Cell migration decision-making into the narrower path.

**Description:** Phase contrast time-lapse imaging of MDA-MB-231 cell migration through the 15  $\mu\text{m}$  feeder track into the 7  $\mu\text{m}$  branch of a Y-shaped collagen microtrack. Time in h:min. Scale bar, 20  $\mu\text{m}$ .

**Title:** Supplementary Movie 3. Intracellular ATP:ADP ratio during migration into the wider path.

**Description:** Confocal fluorescent time-lapse imaging of the normalized PercevalHR ratio (intracellular ATP:ADP ratio) of MDA-MB-231 cell migration through the 15  $\mu\text{m}$  feeder track into the 12  $\mu\text{m}$  branch of a Y-shaped collagen microtrack. Intracellular ATP:ADP levels were assigned a hue on the color spectrum from purple (low intracellular ATP:ADP ratio) to yellow (high intracellular ATP:ADP ratio). Time in h:min. Scale bar, 20  $\mu\text{m}$ .

**Title:** Supplementary Movie 4. Intracellular ATP:ADP ratio during migration into the narrow path.

**Description:** Confocal fluorescent time-lapse imaging of the normalized PercevalHR ratio (intracellular ATP:ADP ratio) of MDA-MB-231 cell migration through the 15  $\mu\text{m}$  feeder track into the 7  $\mu\text{m}$  branch of a Y-shaped collagen microtrack. Intracellular ATP:ADP levels were assigned a hue on the color spectrum from purple (low intracellular ATP:ADP ratio) to yellow (high intracellular ATP:ADP ratio). Time in h:min. Scale bar, 20  $\mu\text{m}$ .
